# Supplementary material for: Massive Release of CD9+ Microvesicles in Human Immunodeficiency Virus Infection, Regardless of Virologic Control
Source: PubMed Central journal article supplement — J Infect Dis. 2020 Jun 30;225(6):1040–9. doi: 10.1093/infdis/jiaa375 (PMC8922002; doi:10.1093/infdis/jiaa375), 2020-06-30
Supplement: jiaa375_suppl_supplementary-table.pdf [file jiaa375_suppl_supplementary-table.pdf]

|                                                    | <b>Control</b> | <b>ART-naïve</b> | <b>ART-exposed</b> | <b>EC</b>      |
|----------------------------------------------------|----------------|------------------|--------------------|----------------|
|                                                    | <b>(n=5)</b>   | <b>(n=5)</b>     | <b>(n=5)</b>       | <b>(n=5)</b>   |
| <b>Mean EV size (nm)</b>                           | 102.0          | 106.6            | 110.8              | 95.5           |
| <b>Range</b>                                       | [85.4 – 121.1] | [91.8 – 136.5]   | [87.3 – 150.2]     | [86.9 – 110.7] |
| <b>EVs (count x 10<sup>11</sup>/mL)</b>            | 7.27           | 5.65             | 0.80               | 2.40           |
| <b>Range</b>                                       | [2.74 – 13.2]  | [1.09 – 16.3]    | [0.24 – 2.01]      | [0.73 – 5.13]  |
| <b>300-1000nm MVs (counts x 10<sup>9</sup>/ml)</b> | 2.1            | 0.4              | 0.9                | 2.9            |
| <b>Range</b>                                       | [0.35 – 4.41]  | [0.02 – 3.46]    | [0.01 – 3.01]      | [0.68 – 13.9]  |
