# Supplementary figures and images for: Massive Release of CD9+ Microvesicles in Human Immunodeficiency Virus Infection, Regardless of Virologic Control
Source: PubMed Central journal article supplement — J Infect Dis. 2020 Jun 30;225(6):1040–9. doi: 10.1093/infdis/jiaa375 (PMC8922002; doi:10.1093/infdis/jiaa375), 2020-06-30

### Control Plasma

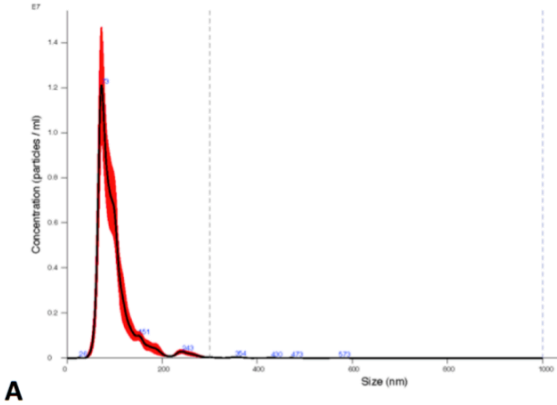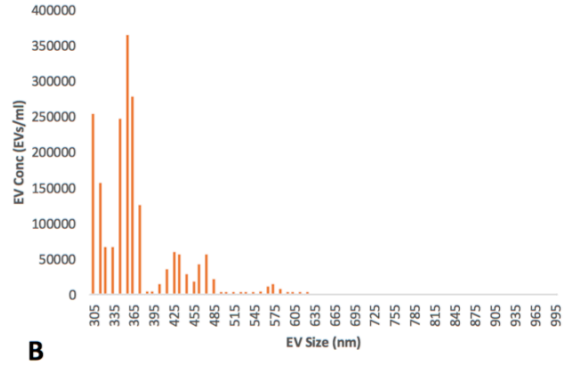

### ART Naive Plasma

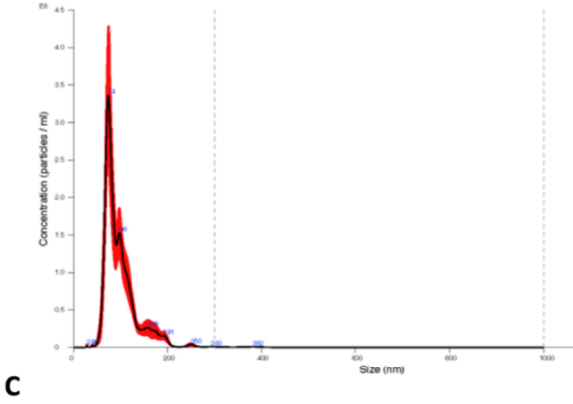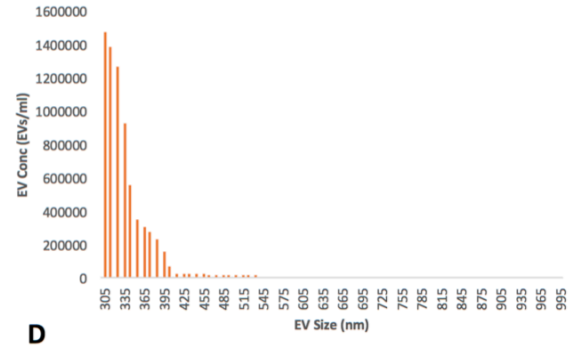

### ART exposed Plasma

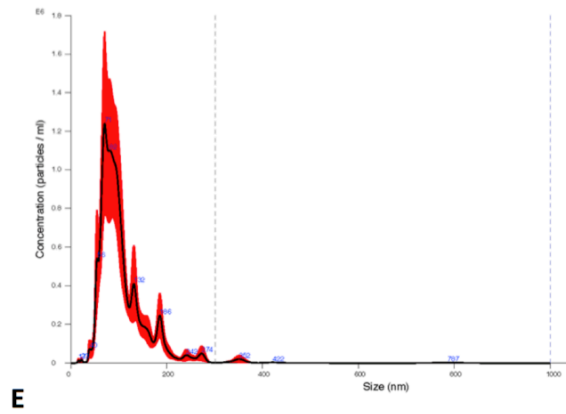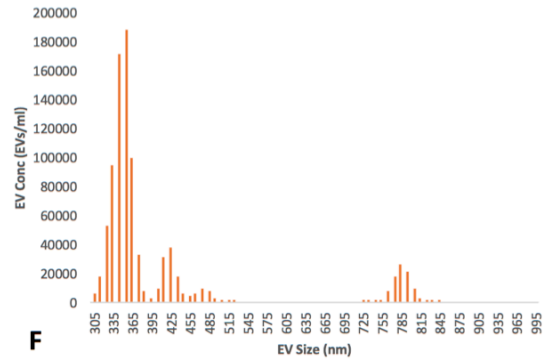

### Elite Controller Plasma

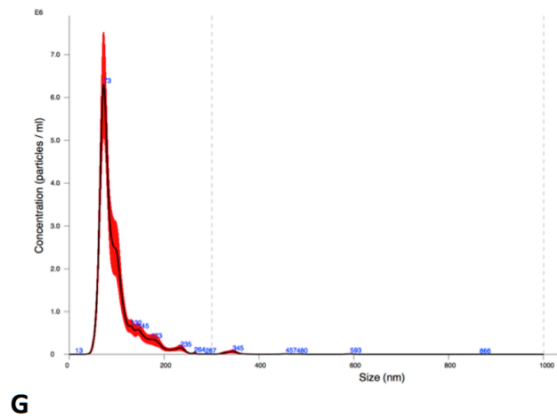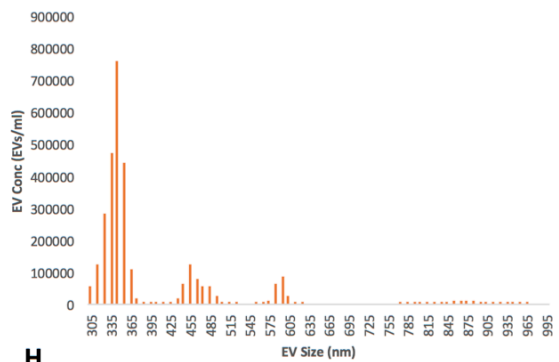

Supplement: jiaa375_suppl_supplementary-figure.pdf [file jiaa375_suppl_supplementary-figure.pdf]
